# Supplementary material for: Can you see what I am talking about? Human speech triggers referential expectation in four-month-old infants
Source: PubMed Central journal article supplement (PMC4555167; doi:10.1038/srep13594), 2015-09-01
Supplement: srep13594-s1.pdf [file srep13594-s1.pdf]

**Can you see what I am talking about? Human speech triggers referential expectation in four-month-old infants**

Hanna Marno, Teresa Farroni, Yamil Vidal Dos Santos, Milad Ekramnia, Marina Nespor and Jacques Mehler

**Supplementary Material File Names**

S1. Example for the Normal Speech condition.mov

S2. Example for the Backward Speech condition.mov

S3. Example for the Silent condition.mov

**Supplementary Material Legends**

**SI 1.** An example for the Normal Speech Condition with an object-directed eye-gaze to the left side.

**SI 2.** An example for the Backward Speech Condition with an object-directed eye-gaze to the right side.

**SI 3.** An example for the Silent Condition with an object-directed eye-gaze to the left side.
